# Supplementary material
Source: publisher figshare collection journal article supplement (https://acs.figshare.com/ndownloader/files/25323685)
Supplement: Supplementary file 1 [file 25323685]

	strain_%_in_direction_e2
strain_%_in_direction_e1		0	-0.05	-0.1	-0.15	-0.2	-0.25	-0.3	-0.35	-0.4	-0.45	-0.5	-0.55	-0.6	-0.65	-0.7	-0.75	-0.8	-0.85	-0.9	-0.95	-1	-1.05	-1.1	-1.15	-1.2	-1.25	-1.3	-1.35	-1.4	-1.45	-1.5	-1.55	-1.6	-1.65	-1.7	-1.75	-1.8	-1.85	-1.9	-1.95	-2	-2.05	-2.1	-2.15	-2.2	-2.25	-2.3	-2.35
	0	0	0.0011	0.0022	0.0032	0.0043	0.0054	0.0065	0.0076	0.0087	0.0097	0.0108	0.0119	0.013	0.0141	0.0151	0.0162	0.0173	0.0184	0.0195	0.0205	0.0216	0.0227	0.0238	0.0249	0.026	0.027	0.0281	0.0292	0.0303	0.0314	0.0324	0.0335	0.0346	0.0357	0.0368	0.0378	0.0389	0.04	0.0411	0.0422	0.0433	0.0443	0.0454	0.0465	0.0476	0.0487	0.0497	0.0508
	-0.05	0.0009	0.002	0.0031	0.0041	0.0052	0.0063	0.0074	0.0085	0.0095	0.0106	0.0117	0.0128	0.0139	0.015	0.016	0.0171	0.0182	0.0193	0.0204	0.0214	0.0225	0.0236	0.0247	0.0258	0.0269	0.0279	0.029	0.0301	0.0312	0.0323	0.0333	0.0344	0.0355	0.0366	0.0377	0.0387	0.0398	0.0409	0.042	0.0431	0.0442	0.0452	0.0463	0.0474	0.0485	0.0496	0.0506	0.0517
	-0.1	0.0018	0.0029	0.004	0.005	0.0061	0.0072	0.0083	0.0094	0.0104	0.0115	0.0126	0.0137	0.0148	0.0159	0.0169	0.018	0.0191	0.0202	0.0213	0.0223	0.0234	0.0245	0.0256	0.0267	0.0278	0.0288	0.0299	0.031	0.0321	0.0332	0.0342	0.0353	0.0364	0.0375	0.0386	0.0396	0.0407	0.0418	0.0429	0.044	0.0451	0.0461	0.0472	0.0483	0.0494	0.0505	0.0515	0.0526
	-0.15	0.0027	0.0038	0.0049	0.0059	0.007	0.0081	0.0092	0.0103	0.0113	0.0124	0.0135	0.0146	0.0157	0.0168	0.0178	0.0189	0.02	0.0211	0.0222	0.0232	0.0243	0.0254	0.0265	0.0276	0.0286	0.0297	0.0308	0.0319	0.033	0.0341	0.0351	0.0362	0.0373	0.0384	0.0395	0.0405	0.0416	0.0427	0.0438	0.0449	0.046	0.047	0.0481	0.0492	0.0503	0.0514	0.0524	0.0535
	-0.2	0.0036	0.0047	0.0058	0.0068	0.0079	0.009	0.0101	0.0112	0.0122	0.0133	0.0144	0.0155	0.0166	0.0177	0.0187	0.0198	0.0209	0.022	0.0231	0.0241	0.0252	0.0263	0.0274	0.0285	0.0295	0.0306	0.0317	0.0328	0.0339	0.035	0.036	0.0371	0.0382	0.0393	0.0404	0.0414	0.0425	0.0436	0.0447	0.0458	0.0468	0.0479	0.049	0.0501	0.0512	0.0523	0.0533	0.0544
	-0.25	0.0045	0.0056	0.0067	0.0077	0.0088	0.0099	0.011	0.0121	0.0131	0.0142	0.0153	0.0164	0.0175	0.0186	0.0196	0.0207	0.0218	0.0229	0.024	0.025	0.0261	0.0272	0.0283	0.0294	0.0304	0.0315	0.0326	0.0337	0.0348	0.0359	0.0369	0.038	0.0391	0.0402	0.0413	0.0423	0.0434	0.0445	0.0456	0.0467	0.0477	0.0488	0.0499	0.051	0.0521	0.0532	0.0542	0.0553
	-0.3	0.0054	0.0065	0.0076	0.0086	0.0097	0.0108	0.0119	0.013	0.014	0.0151	0.0162	0.0173	0.0184	0.0194	0.0205	0.0216	0.0227	0.0238	0.0249	0.0259	0.027	0.0281	0.0292	0.0303	0.0313	0.0324	0.0335	0.0346	0.0357	0.0368	0.0378	0.0389	0.04	0.0411	0.0422	0.0432	0.0443	0.0454	0.0465	0.0476	0.0486	0.0497	0.0508	0.0519	0.053	0.0541	0.0551	0.0562
	-0.35	0.0063	0.0074	0.0085	0.0095	0.0106	0.0117	0.0128	0.0139	0.0149	0.016	0.0171	0.0182	0.0193	0.0203	0.0214	0.0225	0.0236	0.0247	0.0258	0.0268	0.0279	0.029	0.0301	0.0312	0.0322	0.0333	0.0344	0.0355	0.0366	0.0377	0.0387	0.0398	0.0409	0.042	0.0431	0.0441	0.0452	0.0463	0.0474	0.0485	0.0495	0.0506	0.0517	0.0528	0.0539	0.055	0.056	0.0571
	-0.4	0.0072	0.0083	0.0094	0.0104	0.0115	0.0126	0.0137	0.0148	0.0158	0.0169	0.018	0.0191	0.0202	0.0212	0.0223	0.0234	0.0245	0.0256	0.0267	0.0277	0.0288	0.0299	0.031	0.0321	0.0331	0.0342	0.0353	0.0364	0.0375	0.0385	0.0396	0.0407	0.0418	0.0429	0.044	0.045	0.0461	0.0472	0.0483	0.0494	0.0504	0.0515	0.0526	0.0537	0.0548	0.0559	0.0569	0.058
	-0.45	0.0081	0.0092	0.0103	0.0113	0.0124	0.0135	0.0146	0.0157	0.0167	0.0178	0.0189	0.02	0.0211	0.0221	0.0232	0.0243	0.0254	0.0265	0.0276	0.0286	0.0297	0.0308	0.0319	0.033	0.034	0.0351	0.0362	0.0373	0.0384	0.0394	0.0405	0.0416	0.0427	0.0438	0.0449	0.0459	0.047	0.0481	0.0492	0.0503	0.0513	0.0524	0.0535	0.0546	0.0557	0.0567	0.0578	0.0589
	-0.5	0.009	0.0101	0.0111	0.0122	0.0133	0.0144	0.0155	0.0166	0.0176	0.0187	0.0198	0.0209	0.022	0.023	0.0241	0.0252	0.0263	0.0274	0.0285	0.0295	0.0306	0.0317	0.0328	0.0339	0.0349	0.036	0.0371	0.0382	0.0393	0.0403	0.0414	0.0425	0.0436	0.0447	0.0458	0.0468	0.0479	0.049	0.0501	0.0512	0.0522	0.0533	0.0544	0.0555	0.0566	0.0576	0.0587	0.0598
	-0.55	0.0099	0.011	0.012	0.0131	0.0142	0.0153	0.0164	0.0175	0.0185	0.0196	0.0207	0.0218	0.0229	0.0239	0.025	0.0261	0.0272	0.0283	0.0294	0.0304	0.0315	0.0326	0.0337	0.0348	0.0358	0.0369	0.038	0.0391	0.0402	0.0412	0.0423	0.0434	0.0445	0.0456	0.0467	0.0477	0.0488	0.0499	0.051	0.0521	0.0531	0.0542	0.0553	0.0564	0.0575	0.0585	0.0596	0.0607
	-0.6	0.0108	0.0119	0.0129	0.014	0.0151	0.0162	0.0173	0.0184	0.0194	0.0205	0.0216	0.0227	0.0238	0.0248	0.0259	0.027	0.0281	0.0292	0.0302	0.0313	0.0324	0.0335	0.0346	0.0357	0.0367	0.0378	0.0389	0.04	0.0411	0.0421	0.0432	0.0443	0.0454	0.0465	0.0476	0.0486	0.0497	0.0508	0.0519	0.053	0.054	0.0551	0.0562	0.0573	0.0584	0.0594	0.0605	0.0616
	-0.65	0.0117	0.0128	0.0138	0.0149	0.016	0.0171	0.0182	0.0193	0.0203	0.0214	0.0225	0.0236	0.0247	0.0257	0.0268	0.0279	0.029	0.0301	0.0311	0.0322	0.0333	0.0344	0.0355	0.0366	0.0376	0.0387	0.0398	0.0409	0.042	0.043	0.0441	0.0452	0.0463	0.0474	0.0484	0.0495	0.0506	0.0517	0.0528	0.0539	0.0549	0.056	0.0571	0.0582	0.0593	0.0603	0.0614	0.0625
	-0.7	0.0126	0.0137	0.0147	0.0158	0.0169	0.018	0.0191	0.0202	0.0212	0.0223	0.0234	0.0245	0.0256	0.0266	0.0277	0.0288	0.0299	0.031	0.032	0.0331	0.0342	0.0353	0.0364	0.0375	0.0385	0.0396	0.0407	0.0418	0.0429	0.0439	0.045	0.0461	0.0472	0.0483	0.0493	0.0504	0.0515	0.0526	0.0537	0.0548	0.0558	0.0569	0.058	0.0591	0.0602	0.0612	0.0623	0.0634
	-0.75	0.0135	0.0146	0.0156	0.0167	0.0178	0.0189	0.02	0.021	0.0221	0.0232	0.0243	0.0254	0.0265	0.0275	0.0286	0.0297	0.0308	0.0319	0.0329	0.034	0.0351	0.0362	0.0373	0.0384	0.0394	0.0405	0.0416	0.0427	0.0438	0.0448	0.0459	0.047	0.0481	0.0492	0.0502	0.0513	0.0524	0.0535	0.0546	0.0557	0.0567	0.0578	0.0589	0.06	0.0611	0.0621	0.0632	0.0643
	-0.8	0.0144	0.0155	0.0165	0.0176	0.0187	0.0198	0.0209	0.0219	0.023	0.0241	0.0252	0.0263	0.0274	0.0284	0.0295	0.0306	0.0317	0.0328	0.0338	0.0349	0.036	0.0371	0.0382	0.0393	0.0403	0.0414	0.0425	0.0436	0.0447	0.0457	0.0468	0.0479	0.049	0.0501	0.0511	0.0522	0.0533	0.0544	0.0555	0.0566	0.0576	0.0587	0.0598	0.0609	0.062	0.063	0.0641	0.0652
	-0.85	0.0153	0.0164	0.0174	0.0185	0.0196	0.0207	0.0218	0.0228	0.0239	0.025	0.0261	0.0272	0.0283	0.0293	0.0304	0.0315	0.0326	0.0337	0.0347	0.0358	0.0369	0.038	0.0391	0.0401	0.0412	0.0423	0.0434	0.0445	0.0456	0.0466	0.0477	0.0488	0.0499	0.051	0.052	0.0531	0.0542	0.0553	0.0564	0.0575	0.0585	0.0596	0.0607	0.0618	0.0629	0.0639	0.065	0.0661
	-0.9	0.0162	0.0173	0.0183	0.0194	0.0205	0.0216	0.0227	0.0237	0.0248	0.0259	0.027	0.0281	0.0292	0.0302	0.0313	0.0324	0.0335	0.0346	0.0356	0.0367	0.0378	0.0389	0.04	0.041	0.0421	0.0432	0.0443	0.0454	0.0465	0.0475	0.0486	0.0497	0.0508	0.0519	0.0529	0.054	0.0551	0.0562	0.0573	0.0583	0.0594	0.0605	0.0616	0.0627	0.0638	0.0648	0.0659	0.067
	-0.95	0.0171	0.0182	0.0192	0.0203	0.0214	0.0225	0.0236	0.0246	0.0257	0.0268	0.0279	0.029	0.0301	0.0311	0.0322	0.0333	0.0344	0.0355	0.0365	0.0376	0.0387	0.0398	0.0409	0.0419	0.043	0.0441	0.0452	0.0463	0.0474	0.0484	0.0495	0.0506	0.0517	0.0528	0.0538	0.0549	0.056	0.0571	0.0582	0.0592	0.0603	0.0614	0.0625	0.0636	0.0647	0.0657	0.0668	0.0679
	-1	0.018	0.0191	0.0201	0.0212	0.0223	0.0234	0.0245	0.0255	0.0266	0.0277	0.0288	0.0299	0.031	0.032	0.0331	0.0342	0.0353	0.0364	0.0374	0.0385	0.0396	0.0407	0.0418	0.0428	0.0439	0.045	0.0461	0.0472	0.0483	0.0493	0.0504	0.0515	0.0526	0.0537	0.0547	0.0558	0.0569	0.058	0.0591	0.0601	0.0612	0.0623	0.0634	0.0645	0.0656	0.0666	0.0677	0.0688
	-1.05	0.0189	0.02	0.021	0.0221	0.0232	0.0243	0.0254	0.0264	0.0275	0.0286	0.0297	0.0308	0.0318	0.0329	0.034	0.0351	0.0362	0.0373	0.0383	0.0394	0.0405	0.0416	0.0427	0.0437	0.0448	0.0459	0.047	0.0481	0.0492	0.0502	0.0513	0.0524	0.0535	0.0546	0.0556	0.0567	0.0578	0.0589	0.06	0.061	0.0621	0.0632	0.0643	0.0654	0.0665	0.0675	0.0686	0.0697
	-1.1	0.0198	0.0209	0.0219	0.023	0.0241	0.0252	0.0263	0.0273	0.0284	0.0295	0.0306	0.0317	0.0327	0.0338	0.0349	0.036	0.0371	0.0382	0.0392	0.0403	0.0414	0.0425	0.0436	0.0446	0.0457	0.0468	0.0479	0.049	0.05	0.0511	0.0522	0.0533	0.0544	0.0555	0.0565	0.0576	0.0587	0.0598	0.0609	0.0619	0.063	0.0641	0.0652	0.0663	0.0674	0.0684	0.0695	0.0706
	-1.15	0.0207	0.0218	0.0228	0.0239	0.025	0.0261	0.0272	0.0282	0.0293	0.0304	0.0315	0.0326	0.0336	0.0347	0.0358	0.0369	0.038	0.0391	0.0401	0.0412	0.0423	0.0434	0.0445	0.0455	0.0466	0.0477	0.0488	0.0499	0.0509	0.052	0.0531	0.0542	0.0553	0.0564	0.0574	0.0585	0.0596	0.0607	0.0618	0.0628	0.0639	0.065	0.0661	0.0672	0.0682	0.0693	0.0704	0.0715
	-1.2	0.0216	0.0226	0.0237	0.0248	0.0259	0.027	0.0281	0.0291	0.0302	0.0313	0.0324	0.0335	0.0345	0.0356	0.0367	0.0378	0.0389	0.04	0.041	0.0421	0.0432	0.0443	0.0454	0.0464	0.0475	0.0486	0.0497	0.0508	0.0518	0.0529	0.054	0.0551	0.0562	0.0573	0.0583	0.0594	0.0605	0.0616	0.0627	0.0637	0.0648	0.0659	0.067	0.0681	0.0691	0.0702	0.0713	0.0724
	-1.25	0.0225	0.0235	0.0246	0.0257	0.0268	0.0279	0.029	0.03	0.0311	0.0322	0.0333	0.0344	0.0354	0.0365	0.0376	0.0387	0.0398	0.0409	0.0419	0.043	0.0441	0.0452	0.0463	0.0473	0.0484	0.0495	0.0506	0.0517	0.0527	0.0538	0.0549	0.056	0.0571	0.0582	0.0592	0.0603	0.0614	0.0625	0.0636	0.0646	0.0657	0.0668	0.0679	0.069	0.07	0.0711	0.0722	0.0733
	-1.3	0.0234	0.0244	0.0255	0.0266	0.0277	0.0288	0.0299	0.0309	0.032	0.0331	0.0342	0.0353	0.0363	0.0374	0.0385	0.0396	0.0407	0.0417	0.0428	0.0439	0.045	0.0461	0.0472	0.0482	0.0493	0.0504	0.0515	0.0526	0.0536	0.0547	0.0558	0.0569	0.058	0.0591	0.0601	0.0612	0.0623	0.0634	0.0645	0.0655	0.0666	0.0677	0.0688	0.0699	0.0709	0.072	0.0731	0.0742
	-1.35	0.0243	0.0253	0.0264	0.0275	0.0286	0.0297	0.0308	0.0318	0.0329	0.034	0.0351	0.0362	0.0372	0.0383	0.0394	0.0405	0.0416	0.0426	0.0437	0.0448	0.0459	0.047	0.0481	0.0491	0.0502	0.0513	0.0524	0.0535	0.0545	0.0556	0.0567	0.0578	0.0589	0.0599	0.061	0.0621	0.0632	0.0643	0.0654	0.0664	0.0675	0.0686	0.0697	0.0708	0.0718	0.0729	0.074	0.0751
	-1.4	0.0252	0.0262	0.0273	0.0284	0.0295	0.0306	0.0317	0.0327	0.0338	0.0349	0.036	0.0371	0.0381	0.0392	0.0403	0.0414	0.0425	0.0435	0.0446	0.0457	0.0468	0.0479	0.049	0.05	0.0511	0.0522	0.0533	0.0544	0.0554	0.0565	0.0576	0.0587	0.0598	0.0608	0.0619	0.063	0.0641	0.0652	0.0663	0.0673	0.0684	0.0695	0.0706	0.0717	0.0727	0.0738	0.0749	0.076
	-1.45	0.0261	0.0271	0.0282	0.0293	0.0304	0.0315	0.0325	0.0336	0.0347	0.0358	0.0369	0.038	0.039	0.0401	0.0412	0.0423	0.0434	0.0444	0.0455	0.0466	0.0477	0.0488	0.0499	0.0509	0.052	0.0531	0.0542	0.0553	0.0563	0.0574	0.0585	0.0596	0.0607	0.0617	0.0628	0.0639	0.065	0.0661	0.0672	0.0682	0.0693	0.0704	0.0715	0.0726	0.0736	0.0747	0.0758	0.0769
	-1.5	0.027	0.028	0.0291	0.0302	0.0313	0.0324	0.0334	0.0345	0.0356	0.0367	0.0378	0.0389	0.0399	0.041	0.0421	0.0432	0.0443	0.0453	0.0464	0.0475	0.0486	0.0497	0.0508	0.0518	0.0529	0.054	0.0551	0.0562	0.0572	0.0583	0.0594	0.0605	0.0616	0.0626	0.0637	0.0648	0.0659	0.067	0.0681	0.0691	0.0702	0.0713	0.0724	0.0735	0.0745	0.0756	0.0767	0.0778
	-1.55	0.0279	0.0289	0.03	0.0311	0.0322	0.0333	0.0343	0.0354	0.0365	0.0376	0.0387	0.0398	0.0408	0.0419	0.043	0.0441	0.0452	0.0462	0.0473	0.0484	0.0495	0.0506	0.0516	0.0527	0.0538	0.0549	0.056	0.0571	0.0581	0.0592	0.0603	0.0614	0.0625	0.0635	0.0646	0.0657	0.0668	0.0679	0.069	0.07	0.0711	0.0722	0.0733	0.0744	0.0754	0.0765	0.0776	0.0787
	-1.6	0.0288	0.0298	0.0309	0.032	0.0331	0.0342	0.0352	0.0363	0.0374	0.0385	0.0396	0.0407	0.0417	0.0428	0.0439	0.045	0.0461	0.0471	0.0482	0.0493	0.0504	0.0515	0.0525	0.0536	0.0547	0.0558	0.0569	0.058	0.059	0.0601	0.0612	0.0623	0.0634	0.0644	0.0655	0.0666	0.0677	0.0688	0.0698	0.0709	0.072	0.0731	0.0742	0.0753	0.0763	0.0774	0.0785	0.0796
	-1.65	0.0297	0.0307	0.0318	0.0329	0.034	0.0351	0.0361	0.0372	0.0383	0.0394	0.0405	0.0416	0.0426	0.0437	0.0448	0.0459	0.047	0.048	0.0491	0.0502	0.0513	0.0524	0.0534	0.0545	0.0556	0.0567	0.0578	0.0589	0.0599	0.061	0.0621	0.0632	0.0643	0.0653	0.0664	0.0675	0.0686	0.0697	0.0707	0.0718	0.0729	0.074	0.0751	0.0762	0.0772	0.0783	0.0794	0.0805
	-1.7	0.0306	0.0316	0.0327	0.0338	0.0349	0.036	0.037	0.0381	0.0392	0.0403	0.0414	0.0425	0.0435	0.0446	0.0457	0.0468	0.0479	0.0489	0.05	0.0511	0.0522	0.0533	0.0543	0.0554	0.0565	0.0576	0.0587	0.0598	0.0608	0.0619	0.063	0.0641	0.0652	0.0662	0.0673	0.0684	0.0695	0.0706	0.0716	0.0727	0.0738	0.0749	0.076	0.0771	0.0781	0.0792	0.0803	0.0814
	-1.75	0.0315	0.0325	0.0336	0.0347	0.0358	0.0369	0.0379	0.039	0.0401	0.0412	0.0423	0.0433	0.0444	0.0455	0.0466	0.0477	0.0488	0.0498	0.0509	0.052	0.0531	0.0542	0.0552	0.0563	0.0574	0.0585	0.0596	0.0607	0.0617	0.0628	0.0639	0.065	0.0661	0.0671	0.0682	0.0693	0.0704	0.0715	0.0725	0.0736	0.0747	0.0758	0.0769	0.078	0.079	0.0801	0.0812	0.0823
	-1.8	0.0324	0.0334	0.0345	0.0356	0.0367	0.0378	0.0388	0.0399	0.041	0.0421	0.0432	0.0442	0.0453	0.0464	0.0475	0.0486	0.0497	0.0507	0.0518	0.0529	0.054	0.0551	0.0561	0.0572	0.0583	0.0594	0.0605	0.0615	0.0626	0.0637	0.0648	0.0659	0.067	0.068	0.0691	0.0702	0.0713	0.0724	0.0734	0.0745	0.0756	0.0767	0.0778	0.0789	0.0799	0.081	0.0821	0.0832
	-1.85	0.0333	0.0343	0.0354	0.0365	0.0376	0.0387	0.0397	0.0408	0.0419	0.043	0.0441	0.0451	0.0462	0.0473	0.0484	0.0495	0.0506	0.0516	0.0527	0.0538	0.0549	0.056	0.057	0.0581	0.0592	0.0603	0.0614	0.0624	0.0635	0.0646	0.0657	0.0668	0.0679	0.0689	0.07	0.0711	0.0722	0.0733	0.0743	0.0754	0.0765	0.0776	0.0787	0.0798	0.0808	0.0819	0.083	0.0841
	-1.9	0.0341	0.0352	0.0363	0.0374	0.0385	0.0396	0.0406	0.0417	0.0428	0.0439	0.045	0.046	0.0471	0.0482	0.0493	0.0504	0.0515	0.0525	0.0536	0.0547	0.0558	0.0569	0.0579	0.059	0.0601	0.0612	0.0623	0.0633	0.0644	0.0655	0.0666	0.0677	0.0688	0.0698	0.0709	0.072	0.0731	0.0742	0.0752	0.0763	0.0774	0.0785	0.0796	0.0806	0.0817	0.0828	0.0839	0.085
	-1.95	0.035	0.0361	0.0372	0.0383	0.0394	0.0405	0.0415	0.0426	0.0437	0.0448	0.0459	0.0469	0.048	0.0491	0.0502	0.0513	0.0524	0.0534	0.0545	0.0556	0.0567	0.0578	0.0588	0.0599	0.061	0.0621	0.0632	0.0642	0.0653	0.0664	0.0675	0.0686	0.0697	0.0707	0.0718	0.0729	0.074	0.0751	0.0761	0.0772	0.0783	0.0794	0.0805	0.0815	0.0826	0.0837	0.0848	0.0859
	-2	0.0359	0.037	0.0381	0.0392	0.0403	0.0414	0.0424	0.0435	0.0446	0.0457	0.0468	0.0478	0.0489	0.05	0.0511	0.0522	0.0532	0.0543	0.0554	0.0565	0.0576	0.0587	0.0597	0.0608	0.0619	0.063	0.0641	0.0651	0.0662	0.0673	0.0684	0.0695	0.0706	0.0716	0.0727	0.0738	0.0749	0.076	0.077	0.0781	0.0792	0.0803	0.0814	0.0824	0.0835	0.0846	0.0857	0.0868
	-2.05	0.0368	0.0379	0.039	0.0401	0.0412	0.0423	0.0433	0.0444	0.0455	0.0466	0.0477	0.0487	0.0498	0.0509	0.052	0.0531	0.0541	0.0552	0.0563	0.0574	0.0585	0.0596	0.0606	0.0617	0.0628	0.0639	0.065	0.066	0.0671	0.0682	0.0693	0.0704	0.0714	0.0725	0.0736	0.0747	0.0758	0.0769	0.0779	0.079	0.0801	0.0812	0.0823	0.0833	0.0844	0.0855	0.0866	0.0877
	-2.1	0.0377	0.0388	0.0399	0.041	0.0421	0.0432	0.0442	0.0453	0.0464	0.0475	0.0486	0.0496	0.0507	0.0518	0.0529	0.054	0.055	0.0561	0.0572	0.0583	0.0594	0.0605	0.0615	0.0626	0.0637	0.0648	0.0659	0.0669	0.068	0.0691	0.0702	0.0713	0.0723	0.0734	0.0745	0.0756	0.0767	0.0778	0.0788	0.0799	0.081	0.0821	0.0832	0.0842	0.0853	0.0864	0.0875	0.0886
	-2.15	0.0386	0.0397	0.0408	0.0419	0.043	0.0441	0.0451	0.0462	0.0473	0.0484	0.0495	0.0505	0.0516	0.0527	0.0538	0.0549	0.0559	0.057	0.0581	0.0592	0.0603	0.0614	0.0624	0.0635	0.0646	0.0657	0.0668	0.0678	0.0689	0.07	0.0711	0.0722	0.0732	0.0743	0.0754	0.0765	0.0776	0.0787	0.0797	0.0808	0.0819	0.083	0.0841	0.0851	0.0862	0.0873	0.0884	0.0895
	-2.2	0.0395	0.0406	0.0417	0.0428	0.0439	0.0449	0.046	0.0471	0.0482	0.0493	0.0504	0.0514	0.0525	0.0536	0.0547	0.0558	0.0568	0.0579	0.059	0.0601	0.0612	0.0623	0.0633	0.0644	0.0655	0.0666	0.0677	0.0687	0.0698	0.0709	0.072	0.0731	0.0741	0.0752	0.0763	0.0774	0.0785	0.0796	0.0806	0.0817	0.0828	0.0839	0.085	0.086	0.0871	0.0882	0.0893	0.0904
	-2.25	0.0404	0.0415	0.0426	0.0437	0.0448	0.0458	0.0469	0.048	0.0491	0.0502	0.0513	0.0523	0.0534	0.0545	0.0556	0.0567	0.0577	0.0588	0.0599	0.061	0.0621	0.0631	0.0642	0.0653	0.0664	0.0675	0.0686	0.0696	0.0707	0.0718	0.0729	0.074	0.075	0.0761	0.0772	0.0783	0.0794	0.0805	0.0815	0.0826	0.0837	0.0848	0.0859	0.0869	0.088	0.0891	0.0902	0.0913
	-2.3	0.0413	0.0424	0.0435	0.0446	0.0457	0.0467	0.0478	0.0489	0.05	0.0511	0.0522	0.0532	0.0543	0.0554	0.0565	0.0576	0.0586	0.0597	0.0608	0.0619	0.063	0.064	0.0651	0.0662	0.0673	0.0684	0.0695	0.0705	0.0716	0.0727	0.0738	0.0749	0.0759	0.077	0.0781	0.0792	0.0803	0.0814	0.0824	0.0835	0.0846	0.0857	0.0868	0.0878	0.0889	0.09	0.0911	0.0922
	-2.35	0.0422	0.0433	0.0444	0.0455	0.0466	0.0476	0.0487	0.0498	0.0509	0.052	0.0531	0.0541	0.0552	0.0563	0.0574	0.0585	0.0595	0.0606	0.0617	0.0628	0.0639	0.0649	0.066	0.0671	0.0682	0.0693	0.0704	0.0714	0.0725	0.0736	0.0747	0.0758	0.0768	0.0779	0.079	0.0801	0.0812	0.0822	0.0833	0.0844	0.0855	0.0866	0.0877	0.0887	0.0898	0.0909	0.092	0.0931
	-2.4	0.0431	0.0442	0.0453	0.0464	0.0475	0.0485	0.0496	0.0507	0.0518	0.0529	0.054	0.055	0.0561	0.0572	0.0583	0.0594	0.0604	0.0615	0.0626	0.0637	0.0648	0.0658	0.0669	0.068	0.0691	0.0702	0.0713	0.0723	0.0734	0.0745	0.0756	0.0767	0.0777	0.0788	0.0799	0.081	0.0821	0.0831	0.0842	0.0853	0.0864	0.0875	0.0886	0.0896	0.0907	0.0918	0.0929	0.094
	-2.45	0.044	0.0451	0.0462	0.0473	0.0484	0.0494	0.0505	0.0516	0.0527	0.0538	0.0548	0.0559	0.057	0.0581	0.0592	0.0603	0.0613	0.0624	0.0635	0.0646	0.0657	0.0667	0.0678	0.0689	0.07	0.0711	0.0722	0.0732	0.0743	0.0754	0.0765	0.0776	0.0786	0.0797	0.0808	0.0819	0.083	0.084	0.0851	0.0862	0.0873	0.0884	0.0895	0.0905	0.0916	0.0927	0.0938	0.0949
	-2.5	0.0449	0.046	0.0471	0.0482	0.0493	0.0503	0.0514	0.0525	0.0536	0.0547	0.0557	0.0568	0.0579	0.059	0.0601	0.0612	0.0622	0.0633	0.0644	0.0655	0.0666	0.0676	0.0687	0.0698	0.0709	0.072	0.073	0.0741	0.0752	0.0763	0.0774	0.0785	0.0795	0.0806	0.0817	0.0828	0.0839	0.0849	0.086	0.0871	0.0882	0.0893	0.0904	0.0914	0.0925	0.0936	0.0947	0.0958
	-2.55	0.0458	0.0469	0.048	0.0491	0.0502	0.0512	0.0523	0.0534	0.0545	0.0556	0.0566	0.0577	0.0588	0.0599	0.061	0.0621	0.0631	0.0642	0.0653	0.0664	0.0675	0.0685	0.0696	0.0707	0.0718	0.0729	0.0739	0.075	0.0761	0.0772	0.0783	0.0794	0.0804	0.0815	0.0826	0.0837	0.0848	0.0858	0.0869	0.088	0.0891	0.0902	0.0913	0.0923	0.0934	0.0945	0.0956	0.0967
	-2.6	0.0467	0.0478	0.0489	0.05	0.0511	0.0521	0.0532	0.0543	0.0554	0.0565	0.0575	0.0586	0.0597	0.0608	0.0619	0.063	0.064	0.0651	0.0662	0.0673	0.0684	0.0694	0.0705	0.0716	0.0727	0.0738	0.0748	0.0759	0.077	0.0781	0.0792	0.0803	0.0813	0.0824	0.0835	0.0846	0.0857	0.0867	0.0878	0.0889	0.09	0.0911	0.0921	0.0932	0.0943	0.0954	0.0965	0.0976
	-2.65	0.0476	0.0487	0.0498	0.0509	0.052	0.053	0.0541	0.0552	0.0563	0.0574	0.0584	0.0595	0.0606	0.0617	0.0628	0.0639	0.0649	0.066	0.0671	0.0682	0.0693	0.0703	0.0714	0.0725	0.0736	0.0747	0.0757	0.0768	0.0779	0.079	0.0801	0.0812	0.0822	0.0833	0.0844	0.0855	0.0866	0.0876	0.0887	0.0898	0.0909	0.092	0.093	0.0941	0.0952	0.0963	0.0974	0.0985
	-2.7	0.0485	0.0496	0.0507	0.0518	0.0529	0.0539	0.055	0.0561	0.0572	0.0583	0.0593	0.0604	0.0615	0.0626	0.0637	0.0647	0.0658	0.0669	0.068	0.0691	0.0702	0.0712	0.0723	0.0734	0.0745	0.0756	0.0766	0.0777	0.0788	0.0799	0.081	0.0821	0.0831	0.0842	0.0853	0.0864	0.0875	0.0885	0.0896	0.0907	0.0918	0.0929	0.0939	0.095	0.0961	0.0972	0.0983	0.0994
	-2.75	0.0494	0.0505	0.0516	0.0527	0.0538	0.0548	0.0559	0.057	0.0581	0.0592	0.0602	0.0613	0.0624	0.0635	0.0646	0.0656	0.0667	0.0678	0.0689	0.07	0.0711	0.0721	0.0732	0.0743	0.0754	0.0765	0.0775	0.0786	0.0797	0.0808	0.0819	0.0829	0.084	0.0851	0.0862	0.0873	0.0884	0.0894	0.0905	0.0916	0.0927	0.0938	0.0948	0.0959	0.097	0.0981	0.0992	0.1003
	-2.8	0.0503	0.0514	0.0525	0.0536	0.0547	0.0557	0.0568	0.0579	0.059	0.0601	0.0611	0.0622	0.0633	0.0644	0.0655	0.0665	0.0676	0.0687	0.0698	0.0709	0.072	0.073	0.0741	0.0752	0.0763	0.0774	0.0784	0.0795	0.0806	0.0817	0.0828	0.0838	0.0849	0.086	0.0871	0.0882	0.0893	0.0903	0.0914	0.0925	0.0936	0.0947	0.0957	0.0968	0.0979	0.099	0.1001	0.1012
	-2.85	0.0512	0.0523	0.0534	0.0545	0.0556	0.0566	0.0577	0.0588	0.0599	0.061	0.062	0.0631	0.0642	0.0653	0.0664	0.0674	0.0685	0.0696	0.0707	0.0718	0.0729	0.0739	0.075	0.0761	0.0772	0.0783	0.0793	0.0804	0.0815	0.0826	0.0837	0.0847	0.0858	0.0869	0.088	0.0891	0.0902	0.0912	0.0923	0.0934	0.0945	0.0956	0.0966	0.0977	0.0988	0.0999	0.101	0.102
	-2.9	0.0521	0.0532	0.0543	0.0554	0.0564	0.0575	0.0586	0.0597	0.0608	0.0619	0.0629	0.064	0.0651	0.0662	0.0673	0.0683	0.0694	0.0705	0.0716	0.0727	0.0738	0.0748	0.0759	0.077	0.0781	0.0792	0.0802	0.0813	0.0824	0.0835	0.0846	0.0856	0.0867	0.0878	0.0889	0.09	0.0911	0.0921	0.0932	0.0943	0.0954	0.0965	0.0975	0.0986	0.0997	0.1008	0.1019	0.1029
	-2.95	0.053	0.0541	0.0552	0.0563	0.0573	0.0584	0.0595	0.0606	0.0617	0.0628	0.0638	0.0649	0.066	0.0671	0.0682	0.0692	0.0703	0.0714	0.0725	0.0736	0.0746	0.0757	0.0768	0.0779	0.079	0.0801	0.0811	0.0822	0.0833	0.0844	0.0855	0.0865	0.0876	0.0887	0.0898	0.0909	0.092	0.093	0.0941	0.0952	0.0963	0.0974	0.0984	0.0995	0.1006	0.1017	0.1028	0.1038
	-3	0.0539	0.055	0.0561	0.0572	0.0582	0.0593	0.0604	0.0615	0.0626	0.0637	0.0647	0.0658	0.0669	0.068	0.0691	0.0701	0.0712	0.0723	0.0734	0.0745	0.0755	0.0766	0.0777	0.0788	0.0799	0.081	0.082	0.0831	0.0842	0.0853	0.0864	0.0874	0.0885	0.0896	0.0907	0.0918	0.0929	0.0939	0.095	0.0961	0.0972	0.0983	0.0993	0.1004	0.1015	0.1026	0.1037	0.1047
	-3.05	0.0548	0.0559	0.057	0.0581	0.0591	0.0602	0.0613	0.0624	0.0635	0.0646	0.0656	0.0667	0.0678	0.0689	0.07	0.071	0.0721	0.0732	0.0743	0.0754	0.0764	0.0775	0.0786	0.0797	0.0808	0.0819	0.0829	0.084	0.0851	0.0862	0.0873	0.0883	0.0894	0.0905	0.0916	0.0927	0.0937	0.0948	0.0959	0.097	0.0981	0.0992	0.1002	0.1013	0.1024	0.1035	0.1046	0.1056
	-3.1	0.0557	0.0568	0.0579	0.059	0.06	0.0611	0.0622	0.0633	0.0644	0.0655	0.0665	0.0676	0.0687	0.0698	0.0709	0.0719	0.073	0.0741	0.0752	0.0763	0.0773	0.0784	0.0795	0.0806	0.0817	0.0828	0.0838	0.0849	0.086	0.0871	0.0882	0.0892	0.0903	0.0914	0.0925	0.0936	0.0946	0.0957	0.0968	0.0979	0.099	0.1001	0.1011	0.1022	0.1033	0.1044	0.1055	0.1065
	-3.15	0.0566	0.0577	0.0588	0.0599	0.0609	0.062	0.0631	0.0642	0.0653	0.0663	0.0674	0.0685	0.0696	0.0707	0.0718	0.0728	0.0739	0.075	0.0761	0.0772	0.0782	0.0793	0.0804	0.0815	0.0826	0.0837	0.0847	0.0858	0.0869	0.088	0.0891	0.0901	0.0912	0.0923	0.0934	0.0945	0.0955	0.0966	0.0977	0.0988	0.0999	0.101	0.102	0.1031	0.1042	0.1053	0.1064	0.1074
	-3.2	0.0575	0.0586	0.0597	0.0608	0.0618	0.0629	0.064	0.0651	0.0662	0.0672	0.0683	0.0694	0.0705	0.0716	0.0727	0.0737	0.0748	0.0759	0.077	0.0781	0.0791	0.0802	0.0813	0.0824	0.0835	0.0845	0.0856	0.0867	0.0878	0.0889	0.09	0.091	0.0921	0.0932	0.0943	0.0954	0.0964	0.0975	0.0986	0.0997	0.1008	0.1019	0.1029	0.104	0.1051	0.1062	0.1073	0.1083
	-3.25	0.0584	0.0595	0.0606	0.0617	0.0627	0.0638	0.0649	0.066	0.0671	0.0681	0.0692	0.0703	0.0714	0.0725	0.0736	0.0746	0.0757	0.0768	0.0779	0.079	0.08	0.0811	0.0822	0.0833	0.0844	0.0854	0.0865	0.0876	0.0887	0.0898	0.0909	0.0919	0.093	0.0941	0.0952	0.0963	0.0973	0.0984	0.0995	0.1006	0.1017	0.1028	0.1038	0.1049	0.106	0.1071	0.1082	0.1092
	-3.3	0.0593	0.0604	0.0615	0.0626	0.0636	0.0647	0.0658	0.0669	0.068	0.069	0.0701	0.0712	0.0723	0.0734	0.0745	0.0755	0.0766	0.0777	0.0788	0.0799	0.0809	0.082	0.0831	0.0842	0.0853	0.0863	0.0874	0.0885	0.0896	0.0907	0.0918	0.0928	0.0939	0.095	0.0961	0.0972	0.0982	0.0993	0.1004	0.1015	0.1026	0.1036	0.1047	0.1058	0.1069	0.108	0.1091	0.1101
	-3.35	0.0602	0.0613	0.0624	0.0635	0.0645	0.0656	0.0667	0.0678	0.0689	0.0699	0.071	0.0721	0.0732	0.0743	0.0754	0.0764	0.0775	0.0786	0.0797	0.0808	0.0818	0.0829	0.084	0.0851	0.0862	0.0872	0.0883	0.0894	0.0905	0.0916	0.0927	0.0937	0.0948	0.0959	0.097	0.0981	0.0991	0.1002	0.1013	0.1024	0.1035	0.1045	0.1056	0.1067	0.1078	0.1089	0.11	0.111
	-3.4	0.0611	0.0622	0.0633	0.0644	0.0654	0.0665	0.0676	0.0687	0.0698	0.0708	0.0719	0.073	0.0741	0.0752	0.0762	0.0773	0.0784	0.0795	0.0806	0.0817	0.0827	0.0838	0.0849	0.086	0.0871	0.0881	0.0892	0.0903	0.0914	0.0925	0.0936	0.0946	0.0957	0.0968	0.0979	0.099	0.1	0.1011	0.1022	0.1033	0.1044	0.1054	0.1065	0.1076	0.1087	0.1098	0.1109	0.1119
	-3.45	0.062	0.0631	0.0642	0.0653	0.0663	0.0674	0.0685	0.0696	0.0707	0.0717	0.0728	0.0739	0.075	0.0761	0.0771	0.0782	0.0793	0.0804	0.0815	0.0826	0.0836	0.0847	0.0858	0.0869	0.088	0.089	0.0901	0.0912	0.0923	0.0934	0.0945	0.0955	0.0966	0.0977	0.0988	0.0999	0.1009	0.102	0.1031	0.1042	0.1053	0.1063	0.1074	0.1085	0.1096	0.1107	0.1118	0.1128
	-3.5	0.0629	0.064	0.0651	0.0662	0.0672	0.0683	0.0694	0.0705	0.0716	0.0726	0.0737	0.0748	0.0759	0.077	0.078	0.0791	0.0802	0.0813	0.0824	0.0835	0.0845	0.0856	0.0867	0.0878	0.0889	0.0899	0.091	0.0921	0.0932	0.0943	0.0953	0.0964	0.0975	0.0986	0.0997	0.1008	0.1018	0.1029	0.104	0.1051	0.1062	0.1072	0.1083	0.1094	0.1105	0.1116	0.1127	0.1137
	-3.55	0.0638	0.0649	0.066	0.0671	0.0681	0.0692	0.0703	0.0714	0.0725	0.0735	0.0746	0.0757	0.0768	0.0779	0.0789	0.08	0.0811	0.0822	0.0833	0.0844	0.0854	0.0865	0.0876	0.0887	0.0898	0.0908	0.0919	0.093	0.0941	0.0952	0.0962	0.0973	0.0984	0.0995	0.1006	0.1017	0.1027	0.1038	0.1049	0.106	0.1071	0.1081	0.1092	0.1103	0.1114	0.1125	0.1135	0.1146
	-3.6	0.0647	0.0658	0.0669	0.0679	0.069	0.0701	0.0712	0.0723	0.0734	0.0744	0.0755	0.0766	0.0777	0.0788	0.0798	0.0809	0.082	0.0831	0.0842	0.0853	0.0863	0.0874	0.0885	0.0896	0.0907	0.0917	0.0928	0.0939	0.095	0.0961	0.0971	0.0982	0.0993	0.1004	0.1015	0.1026	0.1036	0.1047	0.1058	0.1069	0.108	0.109	0.1101	0.1112	0.1123	0.1134	0.1144	0.1155
	-3.65	0.0656	0.0667	0.0678	0.0688	0.0699	0.071	0.0721	0.0732	0.0743	0.0753	0.0764	0.0775	0.0786	0.0797	0.0807	0.0818	0.0829	0.084	0.0851	0.0861	0.0872	0.0883	0.0894	0.0905	0.0916	0.0926	0.0937	0.0948	0.0959	0.097	0.098	0.0991	0.1002	0.1013	0.1024	0.1035	0.1045	0.1056	0.1067	0.1078	0.1089	0.1099	0.111	0.1121	0.1132	0.1143	0.1153	0.1164
	-3.7	0.0665	0.0676	0.0687	0.0697	0.0708	0.0719	0.073	0.0741	0.0752	0.0762	0.0773	0.0784	0.0795	0.0806	0.0816	0.0827	0.0838	0.0849	0.086	0.087	0.0881	0.0892	0.0903	0.0914	0.0925	0.0935	0.0946	0.0957	0.0968	0.0979	0.0989	0.1	0.1011	0.1022	0.1033	0.1044	0.1054	0.1065	0.1076	0.1087	0.1098	0.1108	0.1119	0.113	0.1141	0.1152	0.1162	0.1173
	-3.75	0.0674	0.0685	0.0696	0.0706	0.0717	0.0728	0.0739	0.075	0.0761	0.0771	0.0782	0.0793	0.0804	0.0815	0.0825	0.0836	0.0847	0.0858	0.0869	0.0879	0.089	0.0901	0.0912	0.0923	0.0934	0.0944	0.0955	0.0966	0.0977	0.0988	0.0998	0.1009	0.102	0.1031	0.1042	0.1052	0.1063	0.1074	0.1085	0.1096	0.1107	0.1117	0.1128	0.1139	0.115	0.1161	0.1171	0.1182
	-3.8	0.0683	0.0694	0.0705	0.0715	0.0726	0.0737	0.0748	0.0759	0.077	0.078	0.0791	0.0802	0.0813	0.0824	0.0834	0.0845	0.0856	0.0867	0.0878	0.0888	0.0899	0.091	0.0921	0.0932	0.0943	0.0953	0.0964	0.0975	0.0986	0.0997	0.1007	0.1018	0.1029	0.104	0.1051	0.1061	0.1072	0.1083	0.1094	0.1105	0.1116	0.1126	0.1137	0.1148	0.1159	0.117	0.118	0.1191
	-3.85	0.0692	0.0703	0.0714	0.0724	0.0735	0.0746	0.0757	0.0768	0.0778	0.0789	0.08	0.0811	0.0822	0.0833	0.0843	0.0854	0.0865	0.0876	0.0887	0.0897	0.0908	0.0919	0.093	0.0941	0.0952	0.0962	0.0973	0.0984	0.0995	0.1006	0.1016	0.1027	0.1038	0.1049	0.106	0.107	0.1081	0.1092	0.1103	0.1114	0.1125	0.1135	0.1146	0.1157	0.1168	0.1179	0.1189	0.12
	-3.9	0.0701	0.0712	0.0723	0.0733	0.0744	0.0755	0.0766	0.0777	0.0787	0.0798	0.0809	0.082	0.0831	0.0842	0.0852	0.0863	0.0874	0.0885	0.0896	0.0906	0.0917	0.0928	0.0939	0.095	0.0961	0.0971	0.0982	0.0993	0.1004	0.1015	0.1025	0.1036	0.1047	0.1058	0.1069	0.1079	0.109	0.1101	0.1112	0.1123	0.1134	0.1144	0.1155	0.1166	0.1177	0.1188	0.1198	0.1209
	-3.95	0.071	0.0721	0.0732	0.0742	0.0753	0.0764	0.0775	0.0786	0.0796	0.0807	0.0818	0.0829	0.084	0.0851	0.0861	0.0872	0.0883	0.0894	0.0905	0.0915	0.0926	0.0937	0.0948	0.0959	0.0969	0.098	0.0991	0.1002	0.1013	0.1024	0.1034	0.1045	0.1056	0.1067	0.1078	0.1088	0.1099	0.111	0.1121	0.1132	0.1143	0.1153	0.1164	0.1175	0.1186	0.1197	0.1207	0.1218
	-4	0.0719	0.073	0.0741	0.0751	0.0762	0.0773	0.0784	0.0795	0.0805	0.0816	0.0827	0.0838	0.0849	0.086	0.087	0.0881	0.0892	0.0903	0.0914	0.0924	0.0935	0.0946	0.0957	0.0968	0.0978	0.0989	0.1	0.1011	0.1022	0.1033	0.1043	0.1054	0.1065	0.1076	0.1087	0.1097	0.1108	0.1119	0.113	0.1141	0.1151	0.1162	0.1173	0.1184	0.1195	0.1206	0.1216	0.1227
	-4.05	0.0728	0.0739	0.075	0.076	0.0771	0.0782	0.0793	0.0804	0.0814	0.0825	0.0836	0.0847	0.0858	0.0869	0.0879	0.089	0.0901	0.0912	0.0923	0.0933	0.0944	0.0955	0.0966	0.0977	0.0987	0.0998	0.1009	0.102	0.1031	0.1042	0.1052	0.1063	0.1074	0.1085	0.1096	0.1106	0.1117	0.1128	0.1139	0.115	0.116	0.1171	0.1182	0.1193	0.1204	0.1215	0.1225	0.1236
	-4.1	0.0737	0.0748	0.0759	0.0769	0.078	0.0791	0.0802	0.0813	0.0823	0.0834	0.0845	0.0856	0.0867	0.0877	0.0888	0.0899	0.091	0.0921	0.0932	0.0942	0.0953	0.0964	0.0975	0.0986	0.0996	0.1007	0.1018	0.1029	0.104	0.1051	0.1061	0.1072	0.1083	0.1094	0.1105	0.1115	0.1126	0.1137	0.1148	0.1159	0.1169	0.118	0.1191	0.1202	0.1213	0.1224	0.1234	0.1245
	-4.15	0.0746	0.0757	0.0768	0.0778	0.0789	0.08	0.0811	0.0822	0.0832	0.0843	0.0854	0.0865	0.0876	0.0886	0.0897	0.0908	0.0919	0.093	0.0941	0.0951	0.0962	0.0973	0.0984	0.0995	0.1005	0.1016	0.1027	0.1038	0.1049	0.106	0.107	0.1081	0.1092	0.1103	0.1114	0.1124	0.1135	0.1146	0.1157	0.1168	0.1178	0.1189	0.12	0.1211	0.1222	0.1233	0.1243	0.1254
	-4.2	0.0755	0.0766	0.0777	0.0787	0.0798	0.0809	0.082	0.0831	0.0841	0.0852	0.0863	0.0874	0.0885	0.0895	0.0906	0.0917	0.0928	0.0939	0.095	0.096	0.0971	0.0982	0.0993	0.1004	0.1014	0.1025	0.1036	0.1047	0.1058	0.1068	0.1079	0.109	0.1101	0.1112	0.1123	0.1133	0.1144	0.1155	0.1166	0.1177	0.1187	0.1198	0.1209	0.122	0.1231	0.1242	0.1252	0.1263
	-4.25	0.0764	0.0775	0.0786	0.0796	0.0807	0.0818	0.0829	0.084	0.085	0.0861	0.0872	0.0883	0.0894	0.0904	0.0915	0.0926	0.0937	0.0948	0.0959	0.0969	0.098	0.0991	0.1002	0.1013	0.1023	0.1034	0.1045	0.1056	0.1067	0.1077	0.1088	0.1099	0.111	0.1121	0.1132	0.1142	0.1153	0.1164	0.1175	0.1186	0.1196	0.1207	0.1218	0.1229	0.124	0.125	0.1261	0.1272
	-4.3	0.0773	0.0784	0.0794	0.0805	0.0816	0.0827	0.0838	0.0849	0.0859	0.087	0.0881	0.0892	0.0903	0.0913	0.0924	0.0935	0.0946	0.0957	0.0968	0.0978	0.0989	0.1	0.1011	0.1022	0.1032	0.1043	0.1054	0.1065	0.1076	0.1086	0.1097	0.1108	0.1119	0.113	0.1141	0.1151	0.1162	0.1173	0.1184	0.1195	0.1205	0.1216	0.1227	0.1238	0.1249	0.1259	0.127	0.1281
	-4.35	0.0782	0.0793	0.0803	0.0814	0.0825	0.0836	0.0847	0.0858	0.0868	0.0879	0.089	0.0901	0.0912	0.0922	0.0933	0.0944	0.0955	0.0966	0.0976	0.0987	0.0998	0.1009	0.102	0.1031	0.1041	0.1052	0.1063	0.1074	0.1085	0.1095	0.1106	0.1117	0.1128	0.1139	0.115	0.116	0.1171	0.1182	0.1193	0.1204	0.1214	0.1225	0.1236	0.1247	0.1258	0.1268	0.1279	0.129
	-4.4	0.0791	0.0802	0.0812	0.0823	0.0834	0.0845	0.0856	0.0867	0.0877	0.0888	0.0899	0.091	0.0921	0.0931	0.0942	0.0953	0.0964	0.0975	0.0985	0.0996	0.1007	0.1018	0.1029	0.104	0.105	0.1061	0.1072	0.1083	0.1094	0.1104	0.1115	0.1126	0.1137	0.1148	0.1159	0.1169	0.118	0.1191	0.1202	0.1213	0.1223	0.1234	0.1245	0.1256	0.1267	0.1277	0.1288	0.1299
	-4.45	0.08	0.0811	0.0821	0.0832	0.0843	0.0854	0.0865	0.0876	0.0886	0.0897	0.0908	0.0919	0.093	0.094	0.0951	0.0962	0.0973	0.0984	0.0994	0.1005	0.1016	0.1027	0.1038	0.1049	0.1059	0.107	0.1081	0.1092	0.1103	0.1113	0.1124	0.1135	0.1146	0.1157	0.1167	0.1178	0.1189	0.12	0.1211	0.1222	0.1232	0.1243	0.1254	0.1265	0.1276	0.1286	0.1297	0.1308
	-4.5	0.0809	0.082	0.083	0.0841	0.0852	0.0863	0.0874	0.0885	0.0895	0.0906	0.0917	0.0928	0.0939	0.0949	0.096	0.0971	0.0982	0.0993	0.1003	0.1014	0.1025	0.1036	0.1047	0.1058	0.1068	0.1079	0.109	0.1101	0.1112	0.1122	0.1133	0.1144	0.1155	0.1166	0.1176	0.1187	0.1198	0.1209	0.122	0.1231	0.1241	0.1252	0.1263	0.1274	0.1285	0.1295	0.1306	0.1317
	-4.55	0.0818	0.0829	0.0839	0.085	0.0861	0.0872	0.0883	0.0893	0.0904	0.0915	0.0926	0.0937	0.0948	0.0958	0.0969	0.098	0.0991	0.1002	0.1012	0.1023	0.1034	0.1045	0.1056	0.1067	0.1077	0.1088	0.1099	0.111	0.1121	0.1131	0.1142	0.1153	0.1164	0.1175	0.1185	0.1196	0.1207	0.1218	0.1229	0.124	0.125	0.1261	0.1272	0.1283	0.1294	0.1304	0.1315	0.1326
	-4.6	0.0827	0.0838	0.0848	0.0859	0.087	0.0881	0.0892	0.0902	0.0913	0.0924	0.0935	0.0946	0.0957	0.0967	0.0978	0.0989	0.1	0.1011	0.1021	0.1032	0.1043	0.1054	0.1065	0.1076	0.1086	0.1097	0.1108	0.1119	0.113	0.114	0.1151	0.1162	0.1173	0.1184	0.1194	0.1205	0.1216	0.1227	0.1238	0.1249	0.1259	0.127	0.1281	0.1292	0.1303	0.1313	0.1324	0.1335
	-4.65	0.0836	0.0847	0.0857	0.0868	0.0879	0.089	0.0901	0.0911	0.0922	0.0933	0.0944	0.0955	0.0966	0.0976	0.0987	0.0998	0.1009	0.102	0.103	0.1041	0.1052	0.1063	0.1074	0.1084	0.1095	0.1106	0.1117	0.1128	0.1139	0.1149	0.116	0.1171	0.1182	0.1193	0.1203	0.1214	0.1225	0.1236	0.1247	0.1258	0.1268	0.1279	0.129	0.1301	0.1312	0.1322	0.1333	0.1344
	-4.7	0.0845	0.0856	0.0866	0.0877	0.0888	0.0899	0.091	0.092	0.0931	0.0942	0.0953	0.0964	0.0975	0.0985	0.0996	0.1007	0.1018	0.1029	0.1039	0.105	0.1061	0.1072	0.1083	0.1093	0.1104	0.1115	0.1126	0.1137	0.1148	0.1158	0.1169	0.118	0.1191	0.1202	0.1212	0.1223	0.1234	0.1245	0.1256	0.1266	0.1277	0.1288	0.1299	0.131	0.1321	0.1331	0.1342	0.1353
	-4.75	0.0854	0.0865	0.0875	0.0886	0.0897	0.0908	0.0919	0.0929	0.094	0.0951	0.0962	0.0973	0.0984	0.0994	0.1005	0.1016	0.1027	0.1038	0.1048	0.1059	0.107	0.1081	0.1092	0.1102	0.1113	0.1124	0.1135	0.1146	0.1157	0.1167	0.1178	0.1189	0.12	0.1211	0.1221	0.1232	0.1243	0.1254	0.1265	0.1275	0.1286	0.1297	0.1308	0.1319	0.133	0.134	0.1351	0.1362
	-4.8	0.0863	0.0874	0.0884	0.0895	0.0906	0.0917	0.0928	0.0938	0.0949	0.096	0.0971	0.0982	0.0992	0.1003	0.1014	0.1025	0.1036	0.1047	0.1057	0.1068	0.1079	0.109	0.1101	0.1111	0.1122	0.1133	0.1144	0.1155	0.1166	0.1176	0.1187	0.1198	0.1209	0.122	0.123	0.1241	0.1252	0.1263	0.1274	0.1284	0.1295	0.1306	0.1317	0.1328	0.1339	0.1349	0.136	0.1371
	-4.85	0.0872	0.0883	0.0893	0.0904	0.0915	0.0926	0.0937	0.0947	0.0958	0.0969	0.098	0.0991	0.1001	0.1012	0.1023	0.1034	0.1045	0.1056	0.1066	0.1077	0.1088	0.1099	0.111	0.112	0.1131	0.1142	0.1153	0.1164	0.1175	0.1185	0.1196	0.1207	0.1218	0.1229	0.1239	0.125	0.1261	0.1272	0.1283	0.1293	0.1304	0.1315	0.1326	0.1337	0.1348	0.1358	0.1369	0.138
	-4.9	0.0881	0.0892	0.0902	0.0913	0.0924	0.0935	0.0946	0.0956	0.0967	0.0978	0.0989	0.1	0.101	0.1021	0.1032	0.1043	0.1054	0.1065	0.1075	0.1086	0.1097	0.1108	0.1119	0.1129	0.114	0.1151	0.1162	0.1173	0.1183	0.1194	0.1205	0.1216	0.1227	0.1238	0.1248	0.1259	0.127	0.1281	0.1292	0.1302	0.1313	0.1324	0.1335	0.1346	0.1357	0.1367	0.1378	0.1389
	-4.95	0.089	0.0901	0.0911	0.0922	0.0933	0.0944	0.0955	0.0965	0.0976	0.0987	0.0998	0.1009	0.1019	0.103	0.1041	0.1052	0.1063	0.1074	0.1084	0.1095	0.1106	0.1117	0.1128	0.1138	0.1149	0.116	0.1171	0.1182	0.1192	0.1203	0.1214	0.1225	0.1236	0.1247	0.1257	0.1268	0.1279	0.129	0.1301	0.1311	0.1322	0.1333	0.1344	0.1355	0.1365	0.1376	0.1387	0.1398
	-5	0.0899	0.0909	0.092	0.0931	0.0942	0.0953	0.0964	0.0974	0.0985	0.0996	0.1007	0.1018	0.1028	0.1039	0.105	0.1061	0.1072	0.1083	0.1093	0.1104	0.1115	0.1126	0.1137	0.1147	0.1158	0.1169	0.118	0.1191	0.1201	0.1212	0.1223	0.1234	0.1245	0.1256	0.1266	0.1277	0.1288	0.1299	0.131	0.132	0.1331	0.1342	0.1353	0.1364	0.1374	0.1385	0.1396	0.1407
	-5.05	0.0908	0.0918	0.0929	0.094	0.0951	0.0962	0.0973	0.0983	0.0994	0.1005	0.1016	0.1027	0.1037	0.1048	0.1059	0.107	0.1081	0.1092	0.1102	0.1113	0.1124	0.1135	0.1146	0.1156	0.1167	0.1178	0.1189	0.12	0.121	0.1221	0.1232	0.1243	0.1254	0.1265	0.1275	0.1286	0.1297	0.1308	0.1319	0.1329	0.134	0.1351	0.1362	0.1373	0.1383	0.1394	0.1405	0.1416
	-5.1	0.0917	0.0927	0.0938	0.0949	0.096	0.0971	0.0982	0.0992	0.1003	0.1014	0.1025	0.1036	0.1046	0.1057	0.1068	0.1079	0.109	0.11	0.1111	0.1122	0.1133	0.1144	0.1155	0.1165	0.1176	0.1187	0.1198	0.1209	0.1219	0.123	0.1241	0.1252	0.1263	0.1274	0.1284	0.1295	0.1306	0.1317	0.1328	0.1338	0.1349	0.136	0.1371	0.1382	0.1392	0.1403	0.1414	0.1425
	-5.15	0.0926	0.0936	0.0947	0.0958	0.0969	0.098	0.0991	0.1001	0.1012	0.1023	0.1034	0.1045	0.1055	0.1066	0.1077	0.1088	0.1099	0.1109	0.112	0.1131	0.1142	0.1153	0.1164	0.1174	0.1185	0.1196	0.1207	0.1218	0.1228	0.1239	0.125	0.1261	0.1272	0.1282	0.1293	0.1304	0.1315	0.1326	0.1337	0.1347	0.1358	0.1369	0.138	0.1391	0.1401	0.1412	0.1423	0.1434
	-5.2	0.0935	0.0945	0.0956	0.0967	0.0978	0.0989	0.1	0.101	0.1021	0.1032	0.1043	0.1054	0.1064	0.1075	0.1086	0.1097	0.1108	0.1118	0.1129	0.114	0.1151	0.1162	0.1173	0.1183	0.1194	0.1205	0.1216	0.1227	0.1237	0.1248	0.1259	0.127	0.1281	0.1291	0.1302	0.1313	0.1324	0.1335	0.1346	0.1356	0.1367	0.1378	0.1389	0.14	0.141	0.1421	0.1432	0.1443
	-5.25	0.0944	0.0954	0.0965	0.0976	0.0987	0.0998	0.1008	0.1019	0.103	0.1041	0.1052	0.1063	0.1073	0.1084	0.1095	0.1106	0.1117	0.1127	0.1138	0.1149	0.116	0.1171	0.1182	0.1192	0.1203	0.1214	0.1225	0.1236	0.1246	0.1257	0.1268	0.1279	0.129	0.13	0.1311	0.1322	0.1333	0.1344	0.1355	0.1365	0.1376	0.1387	0.1398	0.1409	0.1419	0.143	0.1441	0.1452
	-5.3	0.0953	0.0963	0.0974	0.0985	0.0996	0.1007	0.1017	0.1028	0.1039	0.105	0.1061	0.1072	0.1082	0.1093	0.1104	0.1115	0.1126	0.1136	0.1147	0.1158	0.1169	0.118	0.1191	0.1201	0.1212	0.1223	0.1234	0.1245	0.1255	0.1266	0.1277	0.1288	0.1299	0.1309	0.132	0.1331	0.1342	0.1353	0.1364	0.1374	0.1385	0.1396	0.1407	0.1418	0.1428	0.1439	0.145	0.1461
	-5.35	0.0962	0.0972	0.0983	0.0994	0.1005	0.1016	0.1026	0.1037	0.1048	0.1059	0.107	0.1081	0.1091	0.1102	0.1113	0.1124	0.1135	0.1145	0.1156	0.1167	0.1178	0.1189	0.1199	0.121	0.1221	0.1232	0.1243	0.1254	0.1264	0.1275	0.1286	0.1297	0.1308	0.1318	0.1329	0.134	0.1351	0.1362	0.1373	0.1383	0.1394	0.1405	0.1416	0.1427	0.1437	0.1448	0.1459	0.147
	-5.4	0.0971	0.0981	0.0992	0.1003	0.1014	0.1025	0.1035	0.1046	0.1057	0.1068	0.1079	0.109	0.11	0.1111	0.1122	0.1133	0.1144	0.1154	0.1165	0.1176	0.1187	0.1198	0.1208	0.1219	0.123	0.1241	0.1252	0.1263	0.1273	0.1284	0.1295	0.1306	0.1317	0.1327	0.1338	0.1349	0.136	0.1371	0.1381	0.1392	0.1403	0.1414	0.1425	0.1436	0.1446	0.1457	0.1468	0.1479
	-5.45	0.098	0.099	0.1001	0.1012	0.1023	0.1034	0.1044	0.1055	0.1066	0.1077	0.1088	0.1099	0.1109	0.112	0.1131	0.1142	0.1153	0.1163	0.1174	0.1185	0.1196	0.1207	0.1217	0.1228	0.1239	0.125	0.1261	0.1272	0.1282	0.1293	0.1304	0.1315	0.1326	0.1336	0.1347	0.1358	0.1369	0.138	0.139	0.1401	0.1412	0.1423	0.1434	0.1445	0.1455	0.1466	0.1477	0.1488
	-5.5	0.0989	0.0999	0.101	0.1021	0.1032	0.1043	0.1053	0.1064	0.1075	0.1086	0.1097	0.1108	0.1118	0.1129	0.114	0.1151	0.1162	0.1172	0.1183	0.1194	0.1205	0.1216	0.1226	0.1237	0.1248	0.1259	0.127	0.1281	0.1291	0.1302	0.1313	0.1324	0.1335	0.1345	0.1356	0.1367	0.1378	0.1389	0.1399	0.141	0.1421	0.1432	0.1443	0.1454	0.1464	0.1475	0.1486	0.1497
	-5.55	0.0998	0.1008	0.1019	0.103	0.1041	0.1052	0.1062	0.1073	0.1084	0.1095	0.1106	0.1116	0.1127	0.1138	0.1149	0.116	0.1171	0.1181	0.1192	0.1203	0.1214	0.1225	0.1235	0.1246	0.1257	0.1268	0.1279	0.129	0.13	0.1311	0.1322	0.1333	0.1344	0.1354	0.1365	0.1376	0.1387	0.1398	0.1408	0.1419	0.143	0.1441	0.1452	0.1463	0.1473	0.1484	0.1495	0.1506
	-5.6	0.1007	0.1017	0.1028	0.1039	0.105	0.1061	0.1071	0.1082	0.1093	0.1104	0.1115	0.1125	0.1136	0.1147	0.1158	0.1169	0.118	0.119	0.1201	0.1212	0.1223	0.1234	0.1244	0.1255	0.1266	0.1277	0.1288	0.1298	0.1309	0.132	0.1331	0.1342	0.1353	0.1363	0.1374	0.1385	0.1396	0.1407	0.1417	0.1428	0.1439	0.145	0.1461	0.1472	0.1482	0.1493	0.1504	0.1515
	-5.65	0.1016	0.1026	0.1037	0.1048	0.1059	0.107	0.108	0.1091	0.1102	0.1113	0.1124	0.1134	0.1145	0.1156	0.1167	0.1178	0.1189	0.1199	0.121	0.1221	0.1232	0.1243	0.1253	0.1264	0.1275	0.1286	0.1297	0.1307	0.1318	0.1329	0.134	0.1351	0.1362	0.1372	0.1383	0.1394	0.1405	0.1416	0.1426	0.1437	0.1448	0.1459	0.147	0.148	0.1491	0.1502	0.1513	0.1524
	-5.7	0.1024	0.1035	0.1046	0.1057	0.1068	0.1079	0.1089	0.11	0.1111	0.1122	0.1133	0.1143	0.1154	0.1165	0.1176	0.1187	0.1198	0.1208	0.1219	0.123	0.1241	0.1252	0.1262	0.1273	0.1284	0.1295	0.1306	0.1316	0.1327	0.1338	0.1349	0.136	0.1371	0.1381	0.1392	0.1403	0.1414	0.1425	0.1435	0.1446	0.1457	0.1468	0.1479	0.1489	0.15	0.1511	0.1522	0.1533
	-5.75	0.1033	0.1044	0.1055	0.1066	0.1077	0.1088	0.1098	0.1109	0.112	0.1131	0.1142	0.1152	0.1163	0.1174	0.1185	0.1196	0.1207	0.1217	0.1228	0.1239	0.125	0.1261	0.1271	0.1282	0.1293	0.1304	0.1315	0.1325	0.1336	0.1347	0.1358	0.1369	0.138	0.139	0.1401	0.1412	0.1423	0.1434	0.1444	0.1455	0.1466	0.1477	0.1488	0.1498	0.1509	0.152	0.1531	0.1542
	-5.8	0.1042	0.1053	0.1064	0.1075	0.1086	0.1097	0.1107	0.1118	0.1129	0.114	0.1151	0.1161	0.1172	0.1183	0.1194	0.1205	0.1215	0.1226	0.1237	0.1248	0.1259	0.127	0.128	0.1291	0.1302	0.1313	0.1324	0.1334	0.1345	0.1356	0.1367	0.1378	0.1389	0.1399	0.141	0.1421	0.1432	0.1443	0.1453	0.1464	0.1475	0.1486	0.1497	0.1507	0.1518	0.1529	0.154	0.1551
	-5.85	0.1051	0.1062	0.1073	0.1084	0.1095	0.1106	0.1116	0.1127	0.1138	0.1149	0.116	0.117	0.1181	0.1192	0.1203	0.1214	0.1224	0.1235	0.1246	0.1257	0.1268	0.1279	0.1289	0.13	0.1311	0.1322	0.1333	0.1343	0.1354	0.1365	0.1376	0.1387	0.1397	0.1408	0.1419	0.143	0.1441	0.1452	0.1462	0.1473	0.1484	0.1495	0.1506	0.1516	0.1527	0.1538	0.1549	0.156
	-5.9	0.106	0.1071	0.1082	0.1093	0.1104	0.1115	0.1125	0.1136	0.1147	0.1158	0.1169	0.1179	0.119	0.1201	0.1212	0.1223	0.1233	0.1244	0.1255	0.1266	0.1277	0.1288	0.1298	0.1309	0.132	0.1331	0.1342	0.1352	0.1363	0.1374	0.1385	0.1396	0.1406	0.1417	0.1428	0.1439	0.145	0.1461	0.1471	0.1482	0.1493	0.1504	0.1515	0.1525	0.1536	0.1547	0.1558	0.1569
	-5.95	0.1069	0.108	0.1091	0.1102	0.1113	0.1123	0.1134	0.1145	0.1156	0.1167	0.1178	0.1188	0.1199	0.121	0.1221	0.1232	0.1242	0.1253	0.1264	0.1275	0.1286	0.1297	0.1307	0.1318	0.1329	0.134	0.1351	0.1361	0.1372	0.1383	0.1394	0.1405	0.1415	0.1426	0.1437	0.1448	0.1459	0.147	0.148	0.1491	0.1502	0.1513	0.1524	0.1534	0.1545	0.1556	0.1567	0.1578
	-6	0.1078	0.1089	0.11	0.1111	0.1122	0.1132	0.1143	0.1154	0.1165	0.1176	0.1187	0.1197	0.1208	0.1219	0.123	0.1241	0.1251	0.1262	0.1273	0.1284	0.1295	0.1306	0.1316	0.1327	0.1338	0.1349	0.136	0.137	0.1381	0.1392	0.1403	0.1414	0.1424	0.1435	0.1446	0.1457	0.1468	0.1479	0.1489	0.15	0.1511	0.1522	0.1533	0.1543	0.1554	0.1565	0.1576	0.1587
	-6.05	0.1087	0.1098	0.1109	0.112	0.1131	0.1141	0.1152	0.1163	0.1174	0.1185	0.1196	0.1206	0.1217	0.1228	0.1239	0.125	0.126	0.1271	0.1282	0.1293	0.1304	0.1314	0.1325	0.1336	0.1347	0.1358	0.1369	0.1379	0.139	0.1401	0.1412	0.1423	0.1433	0.1444	0.1455	0.1466	0.1477	0.1488	0.1498	0.1509	0.152	0.1531	0.1542	0.1552	0.1563	0.1574	0.1585	0.1596
	-6.1	0.1096	0.1107	0.1118	0.1129	0.114	0.115	0.1161	0.1172	0.1183	0.1194	0.1205	0.1215	0.1226	0.1237	0.1248	0.1259	0.1269	0.128	0.1291	0.1302	0.1313	0.1323	0.1334	0.1345	0.1356	0.1367	0.1378	0.1388	0.1399	0.141	0.1421	0.1432	0.1442	0.1453	0.1464	0.1475	0.1486	0.1496	0.1507	0.1518	0.1529	0.154	0.1551	0.1561	0.1572	0.1583	0.1594	0.1605
	-6.15	0.1105	0.1116	0.1127	0.1138	0.1149	0.1159	0.117	0.1181	0.1192	0.1203	0.1214	0.1224	0.1235	0.1246	0.1257	0.1268	0.1278	0.1289	0.13	0.1311	0.1322	0.1332	0.1343	0.1354	0.1365	0.1376	0.1387	0.1397	0.1408	0.1419	0.143	0.1441	0.1451	0.1462	0.1473	0.1484	0.1495	0.1505	0.1516	0.1527	0.1538	0.1549	0.156	0.157	0.1581	0.1592	0.1603	0.1614
	-6.2	0.1114	0.1125	0.1136	0.1147	0.1158	0.1168	0.1179	0.119	0.1201	0.1212	0.1223	0.1233	0.1244	0.1255	0.1266	0.1277	0.1287	0.1298	0.1309	0.132	0.1331	0.1341	0.1352	0.1363	0.1374	0.1385	0.1396	0.1406	0.1417	0.1428	0.1439	0.145	0.146	0.1471	0.1482	0.1493	0.1504	0.1514	0.1525	0.1536	0.1547	0.1558	0.1569	0.1579	0.159	0.1601	0.1612	0.1623
	-6.25	0.1123	0.1134	0.1145	0.1156	0.1167	0.1177	0.1188	0.1199	0.121	0.1221	0.1231	0.1242	0.1253	0.1264	0.1275	0.1286	0.1296	0.1307	0.1318	0.1329	0.134	0.135	0.1361	0.1372	0.1383	0.1394	0.1405	0.1415	0.1426	0.1437	0.1448	0.1459	0.1469	0.148	0.1491	0.1502	0.1513	0.1523	0.1534	0.1545	0.1556	0.1567	0.1578	0.1588	0.1599	0.161	0.1621	0.1632
	-6.3	0.1132	0.1143	0.1154	0.1165	0.1176	0.1186	0.1197	0.1208	0.1219	0.123	0.124	0.1251	0.1262	0.1273	0.1284	0.1295	0.1305	0.1316	0.1327	0.1338	0.1349	0.1359	0.137	0.1381	0.1392	0.1403	0.1413	0.1424	0.1435	0.1446	0.1457	0.1468	0.1478	0.1489	0.15	0.1511	0.1522	0.1532	0.1543	0.1554	0.1565	0.1576	0.1587	0.1597	0.1608	0.1619	0.163	0.1641
	-6.35	0.1141	0.1152	0.1163	0.1174	0.1185	0.1195	0.1206	0.1217	0.1228	0.1239	0.1249	0.126	0.1271	0.1282	0.1293	0.1304	0.1314	0.1325	0.1336	0.1347	0.1358	0.1368	0.1379	0.139	0.1401	0.1412	0.1422	0.1433	0.1444	0.1455	0.1466	0.1477	0.1487	0.1498	0.1509	0.152	0.1531	0.1541	0.1552	0.1563	0.1574	0.1585	0.1596	0.1606	0.1617	0.1628	0.1639	0.165
	-6.4	0.115	0.1161	0.1172	0.1183	0.1194	0.1204	0.1215	0.1226	0.1237	0.1248	0.1258	0.1269	0.128	0.1291	0.1302	0.1313	0.1323	0.1334	0.1345	0.1356	0.1367	0.1377	0.1388	0.1399	0.141	0.1421	0.1431	0.1442	0.1453	0.1464	0.1475	0.1486	0.1496	0.1507	0.1518	0.1529	0.154	0.155	0.1561	0.1572	0.1583	0.1594	0.1604	0.1615	0.1626	0.1637	0.1648	0.1659
	-6.45	0.1159	0.117	0.1181	0.1192	0.1203	0.1213	0.1224	0.1235	0.1246	0.1257	0.1267	0.1278	0.1289	0.13	0.1311	0.1322	0.1332	0.1343	0.1354	0.1365	0.1376	0.1386	0.1397	0.1408	0.1419	0.143	0.144	0.1451	0.1462	0.1473	0.1484	0.1495	0.1505	0.1516	0.1527	0.1538	0.1549	0.1559	0.157	0.1581	0.1592	0.1603	0.1613	0.1624	0.1635	0.1646	0.1657	0.1668
	-6.5	0.1168	0.1179	0.119	0.1201	0.1212	0.1222	0.1233	0.1244	0.1255	0.1266	0.1276	0.1287	0.1298	0.1309	0.132	0.133	0.1341	0.1352	0.1363	0.1374	0.1385	0.1395	0.1406	0.1417	0.1428	0.1439	0.1449	0.146	0.1471	0.1482	0.1493	0.1504	0.1514	0.1525	0.1536	0.1547	0.1558	0.1568	0.1579	0.159	0.1601	0.1612	0.1622	0.1633	0.1644	0.1655	0.1666	0.1677
	-6.55	0.1177	0.1188	0.1199	0.121	0.1221	0.1231	0.1242	0.1253	0.1264	0.1275	0.1285	0.1296	0.1307	0.1318	0.1329	0.1339	0.135	0.1361	0.1372	0.1383	0.1394	0.1404	0.1415	0.1426	0.1437	0.1448	0.1458	0.1469	0.148	0.1491	0.1502	0.1512	0.1523	0.1534	0.1545	0.1556	0.1567	0.1577	0.1588	0.1599	0.161	0.1621	0.1631	0.1642	0.1653	0.1664	0.1675	0.1686
	-6.6	0.1186	0.1197	0.1208	0.1219	0.123	0.124	0.1251	0.1262	0.1273	0.1284	0.1294	0.1305	0.1316	0.1327	0.1338	0.1348	0.1359	0.137	0.1381	0.1392	0.1403	0.1413	0.1424	0.1435	0.1446	0.1457	0.1467	0.1478	0.1489	0.15	0.1511	0.1521	0.1532	0.1543	0.1554	0.1565	0.1576	0.1586	0.1597	0.1608	0.1619	0.163	0.164	0.1651	0.1662	0.1673	0.1684	0.1695
	-6.65	0.1195	0.1206	0.1217	0.1228	0.1239	0.1249	0.126	0.1271	0.1282	0.1293	0.1303	0.1314	0.1325	0.1336	0.1347	0.1357	0.1368	0.1379	0.139	0.1401	0.1412	0.1422	0.1433	0.1444	0.1455	0.1466	0.1476	0.1487	0.1498	0.1509	0.152	0.153	0.1541	0.1552	0.1563	0.1574	0.1585	0.1595	0.1606	0.1617	0.1628	0.1639	0.1649	0.166	0.1671	0.1682	0.1693	0.1703
	-6.7	0.1204	0.1215	0.1226	0.1237	0.1247	0.1258	0.1269	0.128	0.1291	0.1302	0.1312	0.1323	0.1334	0.1345	0.1356	0.1366	0.1377	0.1388	0.1399	0.141	0.1421	0.1431	0.1442	0.1453	0.1464	0.1475	0.1485	0.1496	0.1507	0.1518	0.1529	0.1539	0.155	0.1561	0.1572	0.1583	0.1594	0.1604	0.1615	0.1626	0.1637	0.1648	0.1658	0.1669	0.168	0.1691	0.1702	0.1712
	-6.75	0.1213	0.1224	0.1235	0.1246	0.1256	0.1267	0.1278	0.1289	0.13	0.1311	0.1321	0.1332	0.1343	0.1354	0.1365	0.1375	0.1386	0.1397	0.1408	0.1419	0.1429	0.144	0.1451	0.1462	0.1473	0.1484	0.1494	0.1505	0.1516	0.1527	0.1538	0.1548	0.1559	0.157	0.1581	0.1592	0.1603	0.1613	0.1624	0.1635	0.1646	0.1657	0.1667	0.1678	0.1689	0.17	0.1711	0.1721
	-6.8	0.1222	0.1233	0.1244	0.1255	0.1265	0.1276	0.1287	0.1298	0.1309	0.132	0.133	0.1341	0.1352	0.1363	0.1374	0.1384	0.1395	0.1406	0.1417	0.1428	0.1438	0.1449	0.146	0.1471	0.1482	0.1493	0.1503	0.1514	0.1525	0.1536	0.1547	0.1557	0.1568	0.1579	0.159	0.1601	0.1612	0.1622	0.1633	0.1644	0.1655	0.1666	0.1676	0.1687	0.1698	0.1709	0.172	0.173
	-6.85	0.1231	0.1242	0.1253	0.1264	0.1274	0.1285	0.1296	0.1307	0.1318	0.1329	0.1339	0.135	0.1361	0.1372	0.1383	0.1393	0.1404	0.1415	0.1426	0.1437	0.1447	0.1458	0.1469	0.148	0.1491	0.1502	0.1512	0.1523	0.1534	0.1545	0.1556	0.1566	0.1577	0.1588	0.1599	0.161	0.162	0.1631	0.1642	0.1653	0.1664	0.1675	0.1685	0.1696	0.1707	0.1718	0.1729	0.1739
	-6.9	0.124	0.1251	0.1262	0.1273	0.1283	0.1294	0.1305	0.1316	0.1327	0.1338	0.1348	0.1359	0.137	0.1381	0.1392	0.1402	0.1413	0.1424	0.1435	0.1446	0.1456	0.1467	0.1478	0.1489	0.15	0.1511	0.1521	0.1532	0.1543	0.1554	0.1565	0.1575	0.1586	0.1597	0.1608	0.1619	0.1629	0.164	0.1651	0.1662	0.1673	0.1684	0.1694	0.1705	0.1716	0.1727	0.1738	0.1748
	-6.95	0.1249	0.126	0.1271	0.1282	0.1292	0.1303	0.1314	0.1325	0.1336	0.1346	0.1357	0.1368	0.1379	0.139	0.1401	0.1411	0.1422	0.1433	0.1444	0.1455	0.1465	0.1476	0.1487	0.1498	0.1509	0.152	0.153	0.1541	0.1552	0.1563	0.1574	0.1584	0.1595	0.1606	0.1617	0.1628	0.1638	0.1649	0.166	0.1671	0.1682	0.1693	0.1703	0.1714	0.1725	0.1736	0.1747	0.1757
	-7	0.1258	0.1269	0.128	0.1291	0.1301	0.1312	0.1323	0.1334	0.1345	0.1355	0.1366	0.1377	0.1388	0.1399	0.141	0.142	0.1431	0.1442	0.1453	0.1464	0.1474	0.1485	0.1496	0.1507	0.1518	0.1528	0.1539	0.155	0.1561	0.1572	0.1583	0.1593	0.1604	0.1615	0.1626	0.1637	0.1647	0.1658	0.1669	0.168	0.1691	0.1702	0.1712	0.1723	0.1734	0.1745	0.1756	0.1766
	-7.05	0.1267	0.1278	0.1289	0.13	0.131	0.1321	0.1332	0.1343	0.1354	0.1364	0.1375	0.1386	0.1397	0.1408	0.1419	0.1429	0.144	0.1451	0.1462	0.1473	0.1483	0.1494	0.1505	0.1516	0.1527	0.1537	0.1548	0.1559	0.157	0.1581	0.1592	0.1602	0.1613	0.1624	0.1635	0.1646	0.1656	0.1667	0.1678	0.1689	0.17	0.1711	0.1721	0.1732	0.1743	0.1754	0.1765	0.1775
	-7.1	0.1276	0.1287	0.1298	0.1309	0.1319	0.133	0.1341	0.1352	0.1363	0.1373	0.1384	0.1395	0.1406	0.1417	0.1428	0.1438	0.1449	0.146	0.1471	0.1482	0.1492	0.1503	0.1514	0.1525	0.1536	0.1546	0.1557	0.1568	0.1579	0.159	0.1601	0.1611	0.1622	0.1633	0.1644	0.1655	0.1665	0.1676	0.1687	0.1698	0.1709	0.1719	0.173	0.1741	0.1752	0.1763	0.1774	0.1784
	-7.15	0.1285	0.1296	0.1307	0.1318	0.1328	0.1339	0.135	0.1361	0.1372	0.1382	0.1393	0.1404	0.1415	0.1426	0.1437	0.1447	0.1458	0.1469	0.148	0.1491	0.1501	0.1512	0.1523	0.1534	0.1545	0.1555	0.1566	0.1577	0.1588	0.1599	0.161	0.162	0.1631	0.1642	0.1653	0.1664	0.1674	0.1685	0.1696	0.1707	0.1718	0.1728	0.1739	0.175	0.1761	0.1772	0.1783	0.1793
	-7.2	0.1294	0.1305	0.1316	0.1327	0.1337	0.1348	0.1359	0.137	0.1381	0.1391	0.1402	0.1413	0.1424	0.1435	0.1445	0.1456	0.1467	0.1478	0.1489	0.15	0.151	0.1521	0.1532	0.1543	0.1554	0.1564	0.1575	0.1586	0.1597	0.1608	0.1619	0.1629	0.164	0.1651	0.1662	0.1673	0.1683	0.1694	0.1705	0.1716	0.1727	0.1737	0.1748	0.1759	0.177	0.1781	0.1792	0.1802
	-7.25	0.1303	0.1314	0.1325	0.1336	0.1346	0.1357	0.1368	0.1379	0.139	0.14	0.1411	0.1422	0.1433	0.1444	0.1454	0.1465	0.1476	0.1487	0.1498	0.1509	0.1519	0.153	0.1541	0.1552	0.1563	0.1573	0.1584	0.1595	0.1606	0.1617	0.1627	0.1638	0.1649	0.166	0.1671	0.1682	0.1692	0.1703	0.1714	0.1725	0.1736	0.1746	0.1757	0.1768	0.1779	0.179	0.1801	0.1811
	-7.3	0.1312	0.1323	0.1334	0.1345	0.1355	0.1366	0.1377	0.1388	0.1399	0.1409	0.142	0.1431	0.1442	0.1453	0.1463	0.1474	0.1485	0.1496	0.1507	0.1518	0.1528	0.1539	0.155	0.1561	0.1572	0.1582	0.1593	0.1604	0.1615	0.1626	0.1636	0.1647	0.1658	0.1669	0.168	0.1691	0.1701	0.1712	0.1723	0.1734	0.1745	0.1755	0.1766	0.1777	0.1788	0.1799	0.181	0.182
	-7.35	0.1321	0.1332	0.1343	0.1354	0.1364	0.1375	0.1386	0.1397	0.1408	0.1418	0.1429	0.144	0.1451	0.1462	0.1472	0.1483	0.1494	0.1505	0.1516	0.1527	0.1537	0.1548	0.1559	0.157	0.1581	0.1591	0.1602	0.1613	0.1624	0.1635	0.1645	0.1656	0.1667	0.1678	0.1689	0.17	0.171	0.1721	0.1732	0.1743	0.1754	0.1764	0.1775	0.1786	0.1797	0.1808	0.1818	0.1829
	-7.4	0.133	0.1341	0.1352	0.1362	0.1373	0.1384	0.1395	0.1406	0.1417	0.1427	0.1438	0.1449	0.146	0.1471	0.1481	0.1492	0.1503	0.1514	0.1525	0.1536	0.1546	0.1557	0.1568	0.1579	0.159	0.16	0.1611	0.1622	0.1633	0.1644	0.1654	0.1665	0.1676	0.1687	0.1698	0.1709	0.1719	0.173	0.1741	0.1752	0.1763	0.1773	0.1784	0.1795	0.1806	0.1817	0.1827	0.1838
	-7.45	0.1339	0.135	0.1361	0.1371	0.1382	0.1393	0.1404	0.1415	0.1426	0.1436	0.1447	0.1458	0.1469	0.148	0.149	0.1501	0.1512	0.1523	0.1534	0.1544	0.1555	0.1566	0.1577	0.1588	0.1599	0.1609	0.162	0.1631	0.1642	0.1653	0.1663	0.1674	0.1685	0.1696	0.1707	0.1718	0.1728	0.1739	0.175	0.1761	0.1772	0.1782	0.1793	0.1804	0.1815	0.1826	0.1836	0.1847
	-7.5	0.1348	0.1359	0.137	0.138	0.1391	0.1402	0.1413	0.1424	0.1435	0.1445	0.1456	0.1467	0.1478	0.1489	0.1499	0.151	0.1521	0.1532	0.1543	0.1553	0.1564	0.1575	0.1586	0.1597	0.1608	0.1618	0.1629	0.164	0.1651	0.1662	0.1672	0.1683	0.1694	0.1705	0.1716	0.1727	0.1737	0.1748	0.1759	0.177	0.1781	0.1791	0.1802	0.1813	0.1824	0.1835	0.1845	0.1856
	-7.55	0.1357	0.1368	0.1379	0.1389	0.14	0.1411	0.1422	0.1433	0.1444	0.1454	0.1465	0.1476	0.1487	0.1498	0.1508	0.1519	0.153	0.1541	0.1552	0.1562	0.1573	0.1584	0.1595	0.1606	0.1617	0.1627	0.1638	0.1649	0.166	0.1671	0.1681	0.1692	0.1703	0.1714	0.1725	0.1735	0.1746	0.1757	0.1768	0.1779	0.179	0.18	0.1811	0.1822	0.1833	0.1844	0.1854	0.1865
	-7.6	0.1366	0.1377	0.1388	0.1398	0.1409	0.142	0.1431	0.1442	0.1453	0.1463	0.1474	0.1485	0.1496	0.1507	0.1517	0.1528	0.1539	0.155	0.1561	0.1571	0.1582	0.1593	0.1604	0.1615	0.1626	0.1636	0.1647	0.1658	0.1669	0.168	0.169	0.1701	0.1712	0.1723	0.1734	0.1744	0.1755	0.1766	0.1777	0.1788	0.1799	0.1809	0.182	0.1831	0.1842	0.1853	0.1863	0.1874
	-7.65	0.1375	0.1386	0.1397	0.1407	0.1418	0.1429	0.144	0.1451	0.1461	0.1472	0.1483	0.1494	0.1505	0.1516	0.1526	0.1537	0.1548	0.1559	0.157	0.158	0.1591	0.1602	0.1613	0.1624	0.1635	0.1645	0.1656	0.1667	0.1678	0.1689	0.1699	0.171	0.1721	0.1732	0.1743	0.1753	0.1764	0.1775	0.1786	0.1797	0.1808	0.1818	0.1829	0.184	0.1851	0.1862	0.1872	0.1883
	-7.7	0.1384	0.1395	0.1406	0.1416	0.1427	0.1438	0.1449	0.146	0.147	0.1481	0.1492	0.1503	0.1514	0.1525	0.1535	0.1546	0.1557	0.1568	0.1579	0.1589	0.16	0.1611	0.1622	0.1633	0.1643	0.1654	0.1665	0.1676	0.1687	0.1698	0.1708	0.1719	0.173	0.1741	0.1752	0.1762	0.1773	0.1784	0.1795	0.1806	0.1817	0.1827	0.1838	0.1849	0.186	0.1871	0.1881	0.1892
	-7.75	0.1393	0.1404	0.1415	0.1425	0.1436	0.1447	0.1458	0.1469	0.1479	0.149	0.1501	0.1512	0.1523	0.1534	0.1544	0.1555	0.1566	0.1577	0.1588	0.1598	0.1609	0.162	0.1631	0.1642	0.1652	0.1663	0.1674	0.1685	0.1696	0.1707	0.1717	0.1728	0.1739	0.175	0.1761	0.1771	0.1782	0.1793	0.1804	0.1815	0.1826	0.1836	0.1847	0.1858	0.1869	0.188	0.189	0.1901
	-7.8	0.1402	0.1413	0.1424	0.1434	0.1445	0.1456	0.1467	0.1478	0.1488	0.1499	0.151	0.1521	0.1532	0.1543	0.1553	0.1564	0.1575	0.1586	0.1597	0.1607	0.1618	0.1629	0.164	0.1651	0.1661	0.1672	0.1683	0.1694	0.1705	0.1716	0.1726	0.1737	0.1748	0.1759	0.177	0.178	0.1791	0.1802	0.1813	0.1824	0.1834	0.1845	0.1856	0.1867	0.1878	0.1889	0.1899	0.191
	-7.85	0.1411	0.1422	0.1433	0.1443	0.1454	0.1465	0.1476	0.1487	0.1497	0.1508	0.1519	0.153	0.1541	0.1552	0.1562	0.1573	0.1584	0.1595	0.1606	0.1616	0.1627	0.1638	0.1649	0.166	0.167	0.1681	0.1692	0.1703	0.1714	0.1725	0.1735	0.1746	0.1757	0.1768	0.1779	0.1789	0.18	0.1811	0.1822	0.1833	0.1843	0.1854	0.1865	0.1876	0.1887	0.1898	0.1908	0.1919
	-7.9	0.142	0.1431	0.1442	0.1452	0.1463	0.1474	0.1485	0.1496	0.1506	0.1517	0.1528	0.1539	0.155	0.156	0.1571	0.1582	0.1593	0.1604	0.1615	0.1625	0.1636	0.1647	0.1658	0.1669	0.1679	0.169	0.1701	0.1712	0.1723	0.1734	0.1744	0.1755	0.1766	0.1777	0.1788	0.1798	0.1809	0.182	0.1831	0.1842	0.1852	0.1863	0.1874	0.1885	0.1896	0.1907	0.1917	0.1928
	-7.95	0.1429	0.144	0.1451	0.1461	0.1472	0.1483	0.1494	0.1505	0.1515	0.1526	0.1537	0.1548	0.1559	0.1569	0.158	0.1591	0.1602	0.1613	0.1624	0.1634	0.1645	0.1656	0.1667	0.1678	0.1688	0.1699	0.171	0.1721	0.1732	0.1743	0.1753	0.1764	0.1775	0.1786	0.1797	0.1807	0.1818	0.1829	0.184	0.1851	0.1861	0.1872	0.1883	0.1894	0.1905	0.1916	0.1926	0.1937
	-8	0.1438	0.1449	0.146	0.147	0.1481	0.1492	0.1503	0.1514	0.1524	0.1535	0.1546	0.1557	0.1568	0.1578	0.1589	0.16	0.1611	0.1622	0.1633	0.1643	0.1654	0.1665	0.1676	0.1687	0.1697	0.1708	0.1719	0.173	0.1741	0.1751	0.1762	0.1773	0.1784	0.1795	0.1806	0.1816	0.1827	0.1838	0.1849	0.186	0.187	0.1881	0.1892	0.1903	0.1914	0.1925	0.1935	0.1946
[truncated: 113 more columns]
